# Supplementary material
Source: ML conference proceedings conference paper supplement (https://openaccess.thecvf.com/content/WACV2024/html/Shamsi_Improved_Topological_Preservation_WACV_2024_paper.html)
Supplement: Supplementary file 1 [file Shamsi_Improved_Topological_Preservation_WACV_2024_supplemental.pdf]

## 1. Supplementary Material

### 1.1. DS1 and DS2 Experiments with Efficient Channel (ECA) and Triplet Attention (TA) Mechanisms

Our experiments on Efficient Channel and Triplet attention mechanisms showed that evaluation metrics were either lower or the same as those for the SCA attention mechanism we reported in the paper; see Table S1.

### 1.2. Rotation Sensitivity of Soft Skeletonization on DS2

We tested different affine rotation transformations on DS2 for both cIDice and GATS. The range of the rotation sets were coded as follows for *RangeOfSet(Start, Stop, Step)*: *Set 1*: {0, 90, 15}, *Set 2*: {0, 360, 90}, and *Set 3*: {0, 325, 65}. Table S2 shows the mean and standard deviation on test sets of DS2 for 10 trials. MPR uses N random samples the input volume. As can be seen in Table S2, the performance of a model trained on cIDice with Set 2 or Set 3 rotations was degraded, indicating that skeletons produced via soft-skeletonization may be prone to rotation sensitivity due to over-thinning. Rotation sensitivity was not observed for either DS1 or Janelia to as much of an appreciable degree as on DS2 (i.e., 10-trial averages were within their respective standard deviations), likely because DS2 has greater voxel resolution so is more likely to more produce false positives and false negatives due to more instances of small/fine curvilinear structures.

### 1.3. Skeletal Warping: Discrete Cosine Transform Variant of Warping Loss

Our experiments with the Warping loss showed an increase in training time for DS1 to  $\sim 34$  hours for 10 trials with Warping loss versus  $\sim 4$  hours for cIDice,  $\sim 8$  hours for GATS (N=10) or  $\sim 6$  hours for GATS (N=4). To expedite training time we formulated a novel variant of the Warping loss that applies a discrete cosine transform to the soft-skeletonized inputs of the prediction and the target image, and finds critical points of the skeletal topology as described previously; see Homotopic Warping under Related Literature. The evaluation metrics on DS1 of the Skeletal Warping loss are  $0.817 \pm 0.01$ ,  $0.795 \pm 0.018$ , and  $0.783 \pm$  for Dice, cIDice and  $\rho$ -Dice, respectively. These evaluation metrics are similar to the GATS SCA (N=10) loss, but Skeletal Warping loss is slower than GATS SCA by 20 hours. More experiments are required for testing on different datasets, and a different method is needed for improvements in training time.

Table S 1. **Efficient Channel Attention (ECA) and Triplet Attention (TA) on 3D Residual UNets. Mean and standard deviation evaluated on the test set of Dataset 1 (DS1) and Dataset 2 (DS2) across 10 trials. For cDice:  $\alpha = 0.65, k = 3$ , GASK and GATS both use MPR, for which  $N=10$ , GASK uses soft-skeletonization, GATS uses topological smoothing (TS). For TS:  $k=5$  for DS1,  $k=3$  for DS2.**

| Attention | Dataset | Model | Dice $\uparrow$     | cDice $\uparrow$    | $\rho$ -Dice $\uparrow$ | Adj. Rand $\uparrow$ | $\beta_0$ Error $\downarrow$ | $\beta_1$ Error $\downarrow$ |
|-----------|---------|-------|---------------------|---------------------|-------------------------|----------------------|------------------------------|------------------------------|
| ECA       | DS1     | cDice | 0.7951 $\pm$ 0.0070 | 0.7665 $\pm$ 0.0153 | 0.7521 $\pm$ 0.0184     | 0.5887 $\pm$ 0.0139  | 0.3572 $\pm$ 0.0176          | 0.0803 $\pm$ 0.0092          |
|           |         | GASK  | 0.7824 $\pm$ 0.0138 | 0.7287 $\pm$ 0.0457 | 0.7296 $\pm$ 0.0429     | 0.5632 $\pm$ 0.0277  | 0.3284 $\pm$ 0.0218          | 0.0698 $\pm$ 0.0147          |
|           |         | GATS  | 0.8031 $\pm$ 0.0084 | 0.7471 $\pm$ 0.0194 | 0.7713 $\pm$ 0.0205     | 0.6047 $\pm$ 0.0167  | 0.3223 $\pm$ 0.0250          | 0.0682 $\pm$ 0.0074          |
|           | DS2     | cDice | 0.7491 $\pm$ 0.0067 | 0.6046 $\pm$ 0.0155 | 0.6808 $\pm$ 0.0164     | 0.4976 $\pm$ 0.0133  | 0.0638 $\pm$ 0.0164          | 0.1199 $\pm$ 0.0115          |
|           |         | GASK  | 0.5924 $\pm$ 0.0139 | 0.6500 $\pm$ 0.0201 | 0.7449 $\pm$ 0.0137     | 0.1905 $\pm$ 0.0258  | 0.0602 $\pm$ 0.0259          | 0.4541 $\pm$ 0.0135          |
|           |         | GATS  | 0.7331 $\pm$ 0.0114 | 0.5696 $\pm$ 0.0247 | 0.6424 $\pm$ 0.0264     | 0.4657 $\pm$ 0.0227  | 0.0508 $\pm$ 0.0092          | 0.1040 $\pm$ 0.0119          |
| TA        | DS1     | cDice | 0.7970 $\pm$ 0.0076 | 0.7650 $\pm$ 0.0189 | 0.7537 $\pm$ 0.0197     | 0.5924 $\pm$ 0.0152  | 0.3611 $\pm$ 0.0207          | 0.0817 $\pm$ 0.0112          |
|           |         | GASK  | 0.7892 $\pm$ 0.0124 | 0.7399 $\pm$ 0.0332 | 0.7348 $\pm$ 0.0344     | 0.5769 $\pm$ 0.0248  | 0.3085 $\pm$ 0.0334          | 0.0618 $\pm$ 0.0115          |
|           |         | GATS  | 0.8058 $\pm$ 0.0050 | 0.7515 $\pm$ 0.0067 | 0.7701 $\pm$ 0.0133     | 0.6100 $\pm$ 0.0100  | 0.3076 $\pm$ 0.0424          | 0.0627 $\pm$ 0.0064          |
|           | DS2     | cDice | 0.7423 $\pm$ 0.0115 | 0.5912 $\pm$ 0.0241 | 0.6673 $\pm$ 0.0268     | 0.4840 $\pm$ 0.0229  | 0.0674 $\pm$ 0.0127          | 0.1268 $\pm$ 0.0110          |
|           |         | GASK  | 0.6059 $\pm$ 0.0273 | 0.6486 $\pm$ 0.0261 | 0.7437 $\pm$ 0.0152     | 0.2165 $\pm$ 0.0520  | 0.0606 $\pm$ 0.0237          | 0.4450 $\pm$ 0.0280          |
|           |         | GATS  | 0.7325 $\pm$ 0.0089 | 0.5707 $\pm$ 0.0203 | 0.6443 $\pm$ 0.0205     | 0.4645 $\pm$ 0.0177  | 0.0455 $\pm$ 0.0070          | 0.1028 $\pm$ 0.0080          |

Table S 2. **DS2 Affine Rotation Transformation Sensitivity**

| Model                     | Dice $\uparrow$     | cDice $\uparrow$    | $\rho$ -Dice $\uparrow$ | Adj. Rand $\uparrow$ | $\beta_0$ Error $\downarrow$ | $\beta_1$ Error $\downarrow$ |
|---------------------------|---------------------|---------------------|-------------------------|----------------------|------------------------------|------------------------------|
| <i>cDice (Set 1)</i>      | 0.7880 $\pm$ 0.0140 | 0.6890 $\pm$ 0.0270 | 0.7750 $\pm$ 0.0300     | 0.5760 $\pm$ 0.0270  | 0.1270 $\pm$ 0.0310          | 0.1510 $\pm$ 0.0170          |
| <i>cDice (Set 2)</i>      | 0.2360 $\pm$ 0.0554 | 0.0315 $\pm$ 0.0159 | 0.0901 $\pm$ 0.0318     | -0.0053 $\pm$ 0.0017 | 0.8076 $\pm$ 0.1591          | 0.5619 $\pm$ 0.0594          |
| <i>cDice (Set 3)</i>      | 0.1010 $\pm$ 0.1592 | 0.0718 $\pm$ 0.0555 | 0.1147 $\pm$ 0.0612     | 0.0002 $\pm$ 0.0077  | 0.2317 $\pm$ 0.3270          | 0.6015 $\pm$ 0.0928          |
| <i>GATS (N=10, Set 1)</i> | 0.7321 $\pm$ 0.0065 | 0.5699 $\pm$ 0.0149 | 0.6418 $\pm$ 0.0163     | 0.4637 $\pm$ 0.0129  | 0.0461 $\pm$ 0.0076          | 0.1023 $\pm$ 0.0094          |
| <i>GATS (N=10, Set 2)</i> | 0.8029 $\pm$ 0.0068 | 0.7146 $\pm$ 0.0156 | 0.8060 $\pm$ 0.0156     | 0.6052 $\pm$ 0.0135  | 0.0472 $\pm$ 0.0100          | 0.0956 $\pm$ 0.0135          |
| <i>GATS (N=10, Set 3)</i> | 0.8029 $\pm$ 0.0062 | 0.7149 $\pm$ 0.0122 | 0.7997 $\pm$ 0.0159     | 0.6052 $\pm$ 0.0124  | 0.0565 $\pm$ 0.0192          | 0.1081 $\pm$ 0.0220          |
